# Supplementary material for: Utility of Gene Expression Profiling Score Variability to Predict Clinical Events in Heart Transplant Recipients
Source: PubMed Central journal article supplement — Transplantation. 2014 Mar 18;97(6):708–14. doi: 10.1097/01.TP.0000443897.29951.cf (PMC3983476; doi:10.1097/01.tp.0000443897.29951.cf), 2014-03-18
Supplement: tp-97-708-s001.pdf [file tp-97-708-s001.pdf]

## SUPPLEMENTAL DIGITAL CONTENT

SDC Figure S1. Distribution of Gene Expression Profiling Ordinal Scores

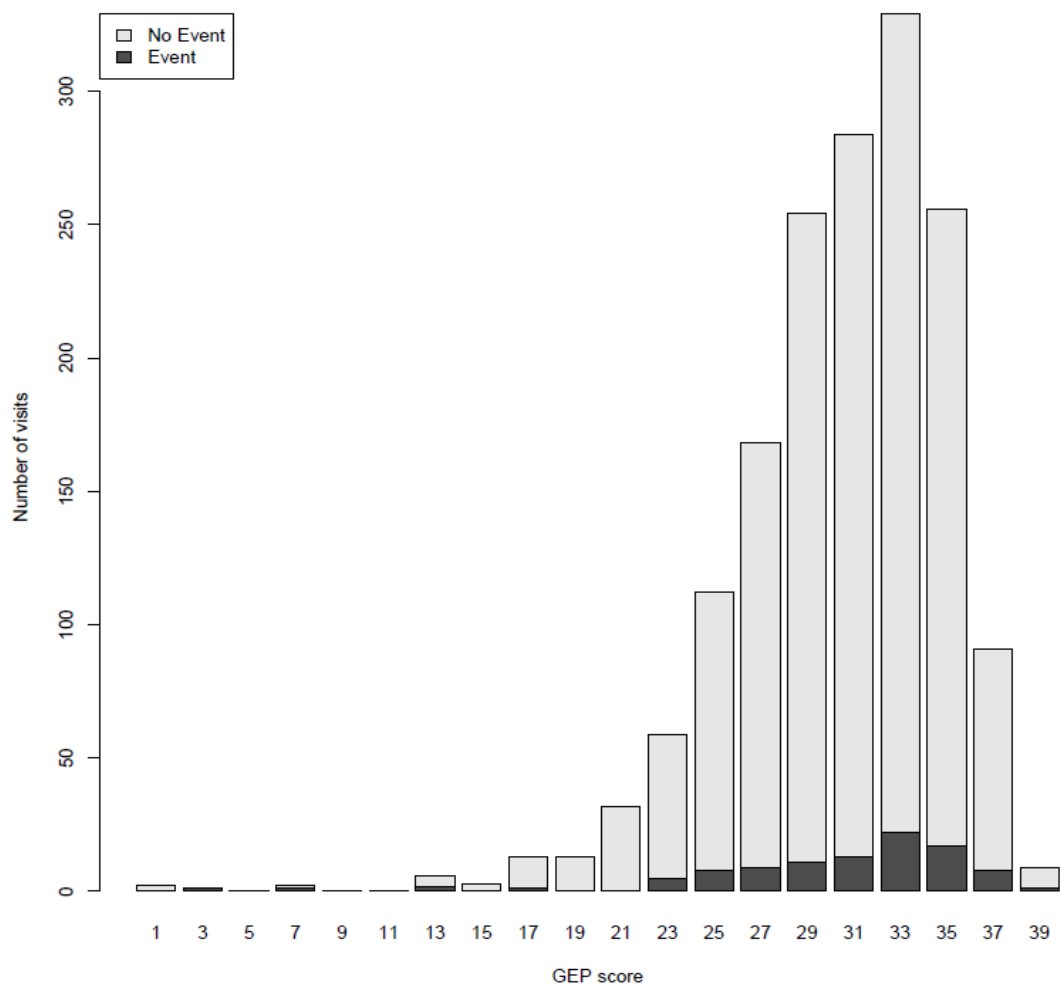

SDC Fig.S1. Distribution of Gene expression profiling ordinal scores (AlloMap scores). The gene-expression profiling score is an integer between 0 and 39. Each score has an associated negative predictive value for acute cellular rejection.

**SDC Table S1**

|                                                                     | Multivariate Analysis Study Cohort | Event Patients               | No Event Patients            |
|---------------------------------------------------------------------|------------------------------------|------------------------------|------------------------------|
| Number of Patients                                                  | 369                                | 30                           | 339                          |
| Number of Tests                                                     | 1634                               | 99                           | 1535                         |
| Test Interval, Mean $\pm$ SD (range), in months                     | 4.4 $\pm$ 2.3<br>(0.4, 24.1)       | 3.6 $\pm$ 1.2<br>(0.8 – 7.1) | 4.4 $\pm$ 2.4<br>(0.4, 24.1) |
| Tests/Patient, Mean $\pm$ SD (range)                                | 4.4 $\pm$ 1.7<br>(2, 10)           | 3.3 $\pm$ 1.2<br>(2-6)       | 4.5 $\pm$ 1.6<br>(2-10)      |
| Gene-expression profiling test ordinal score, Mean $\pm$ SD (range) | 30.9 $\pm$ 4.5<br>(2 - 39)         | 30.6 $\pm$ 6.2<br>(4 - 39)   | 30.9 $\pm$ 4.4<br>(2 - 39)   |
| Gene-expression profiling score variability, Mean $\pm$ SD (range)  | 1.0 $\pm$ 0.8<br>(0.01 - 5.9)      | 1.6 $\pm$ 1.4<br>(0.2 - 5.9) | 1.0 $\pm$ 0.7<br>(0.01, 5.2) |

**SDC Table S2. Multivariate Models to Predict Future Clinical Events\***

| Cox Proportional Hazards Regression<br>Results of Surveillance Information Added to Base Clinical Model*                        |                             |         |                                    |       |                   |
|---------------------------------------------------------------------------------------------------------------------------------|-----------------------------|---------|------------------------------------|-------|-------------------|
|                                                                                                                                 | Regression Coefficient (SE) | p-value | Hazard Ratio (95% CI) <sup>†</sup> | AIC   | C-Index (95% CI)  |
| Base Clinical Model                                                                                                             |                             |         |                                    | 329.5 | 0.68 (0.59,0.78)  |
| Gene-expression profiling test score variability: (standard deviation of gene-expression profiling ordinal scores) <sup>‡</sup> | 0.57 (0.12)                 | <0.001  | 1.76 (1.38, 2.25)                  | 318.0 | 0.69 (0.61,0.76)  |
| Gene-expression profiling test ordinal score (0-39) <sup>‡</sup>                                                                | -0.078 (0.10)               | 0.43    | 0.92 (0.76, 1.12)                  | 330.9 | 0.68 (0.59,0.77)  |
| Gene-expression profiling test threshold score ≥ 34                                                                             | 0.12 (0.43)                 | 0.77    | 1.13 (0.48, 2.65)                  | 331.5 | 0.68 (0.59,0.78)  |
| Gene-expression profiling test score variability, controlling for ordinal score                                                 | 0.63 (0.15)                 | <0.001  | 1.87 (1.39, 2.52)                  | 319.5 | 0.70 (0.62, 0.77) |

\* Clinical events of rejection with hemodynamic compromise, graft dysfunction due to other causes, death, or re-transplantation.

† Hazard Ratio: values less than 1 indicate risk decreases as variable increases; the associated regression coefficient is negative.

‡ Uses transformed gene-expression profiling scores. If x is the AlloMap gene-expression profiling ordinal score, we use  $y = 2.451(\log(x/(40-x)) - 0.234)$

SDC Table S2 adds information to what is found in Table 3 in the main report. Because the Spearman rank correlation between score variability and median score was relatively small, but highly significant, a model was also constructed which controls for within-patient average score when estimating/testing the effect of within-person standard deviation on event rates. The results are shown in the bottom row of SDC Table 2. The regression coefficient for gene-expression score variability remains highly significant ( $p < 0.001$ ) when the model includes adjustment for ordinal scores (see SDC). The C-Index is slightly better (0.70) when controlling for the average score than the model which uses only the variability score added to the base clinical factors (C-Index = 0.69.)

The C-Index values are not very different among the 5 models summarized in SDC Table 2, however, the 95 % confidential intervals range from 0.59 to 0.78, so it is possible that with a future larger dataset, a significant difference in the C-Index may be demonstrated. With the current dataset, which is limited by a relatively small number of event endpoints ( $n=30$ ), the variability model appears to have promise, based on its highly significant regression coefficient and its favorable AIC score.
